# Supplementary material for: A “center-determination” phenomenon of C13H27CO-Gly-Ala-Ala lipotripetides: relationship between the molecular chirality and handedness of organic self-assemblies
Source: Royal Society of Chemistry journal article supplement (doi:10.1039/c9nj01693g), 2019-01-01
Supplement: c9nj01693g1.pdf [file c9nj01693g1.pdf]

## A “Center-determination” Phenomenon of C<sub>13</sub>H<sub>27</sub>CO-Gly-Ala-Ala Lipotriptides: Relationship between Molecular Chirality and Handedness of Organic Self-assembly

Kexiao Guo, Lianglin Zhang, Shuwei Lin, Yi Li\*, Baozong Li and Yonggang Yang\*

Jiangsu Key Laboratory of Advanced Functional Polymer Design and Application, Department of Polymer Science and Engineering, State and Local Joint Engineering Laboratory for Novel Functional Polymeric Materials, College of Chemistry, Chemical Engineering and Materials Science, Soochow University, Suzhou 215123, China.

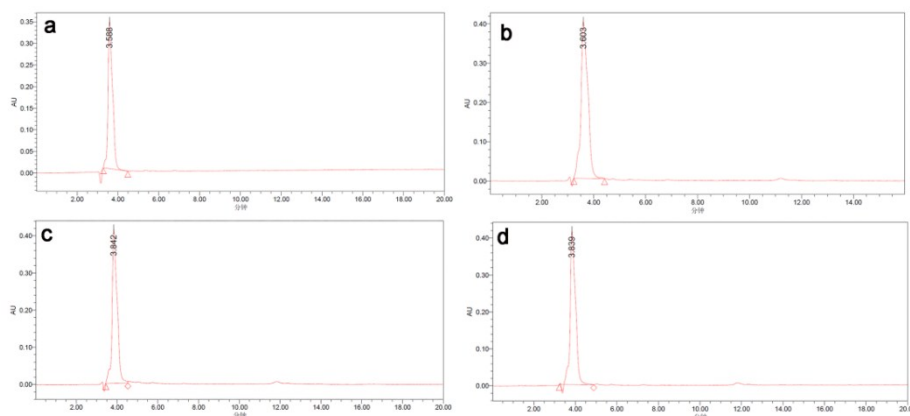

Fig. S1 HPLC data of the lipotriptides (a) *NLL-1*, (b) *NLD-1*, (c) *NDL-1* and (d) *NDD-1*.

**Table S1** MGCs of the lipotriptides in organic solvents.

|                    | <i>NLL-1</i> | <i>NDD-1</i> | <i>NLD-1</i> | <i>NDL-1</i> |
|--------------------|--------------|--------------|--------------|--------------|
| DMF                | Solution     | Solution     | Solution     | Solution     |
| DMSO               | Solution     | Solution     | Solution     | Solution     |
| THF                | Solution     | Solution     | Solution     | Solution     |
| Methanol           | Solution     | Solution     | Solution     | Solution     |
| Toluene            | 20           | 20           | 20           | 20           |
| <i>n</i> -Propanol | Precipitate  | Precipitate  | Precipitate  | Precipitate  |
| 1,4-Dioxane        | 45           | 45           | 40           | 40           |
| Acetone            | Insoluble    | Insoluble    | Insoluble    | Insoluble    |
| Cyclohexane        | Insoluble    | Insoluble    | Insoluble    | Insoluble    |
| Ethyl acetate      | Insoluble    | Insoluble    | Insoluble    | Insoluble    |
| Acetonitrile       | Insoluble    | Insoluble    | Insoluble    | Insoluble    |

The data shown in the above table refer to the minimum gelation concentrations (MGCs) ( $\text{g L}^{-1}$ ) of the lipotriptides in the listed organic solvents at 25 °C. Solution: no gelation occurred at a concentration of  $30 \text{ g L}^{-1}$ .

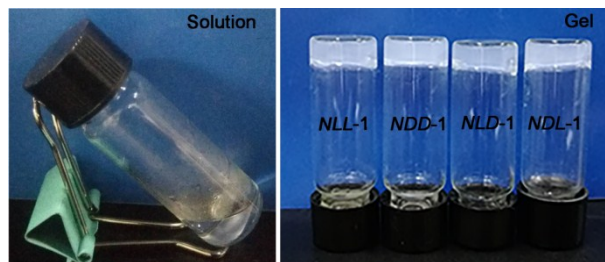

**Fig. S2** The photographs of the lipotriptides solutions (70 °C) and gels (25 °C) in mixed solvent of methanol/water (6/4, v/v).

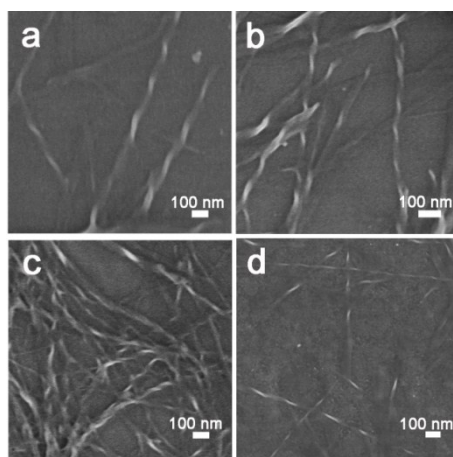

**Fig. S3** FE-SEM images of the gels prepared in a mixture of methanol/water (6/4, v/v) at a concentration of 10 g L<sup>-1</sup>. (a) *NLL-1*, (b) *NLD-1*, (c) *NDL-1* and (d) *NDD-1*.

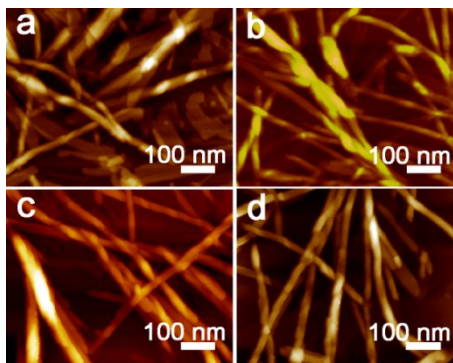

**Fig. S4** AFM images of the xerogels prepared in a mixture of methanol/water (6/4, v/v) at a concentration of 10 g L<sup>-1</sup>. (a) *NLL-1*, (b) *NLD-1*, (c) *NDL-1* and (d) *NDD-1*.

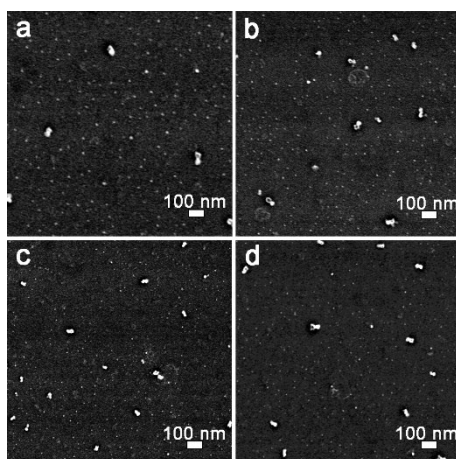

**Fig. S5** FE-SEM images of the samples prepared in a mixture of methanol/water (6/4, v/v) at a concentration of  $10 \text{ g L}^{-1}$  and  $55 \text{ }^\circ\text{C}$ . (a) *NLL-1*, (b) *NLD-1*, (c) *NDL-1* and (d) *NDD-1*.

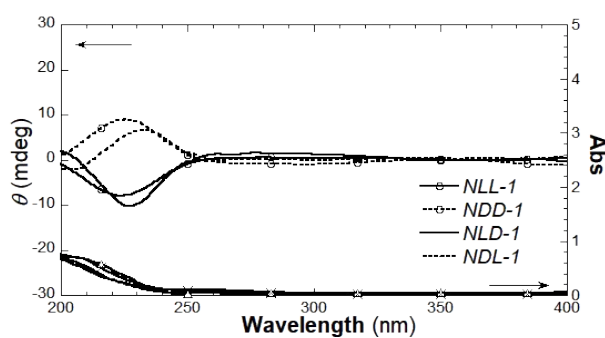

**Fig. S6** CD and UV spectra of the sols in a mixture of methanol/water (6/4, v/v) at a concentration of  $10 \text{ g L}^{-1}$ .

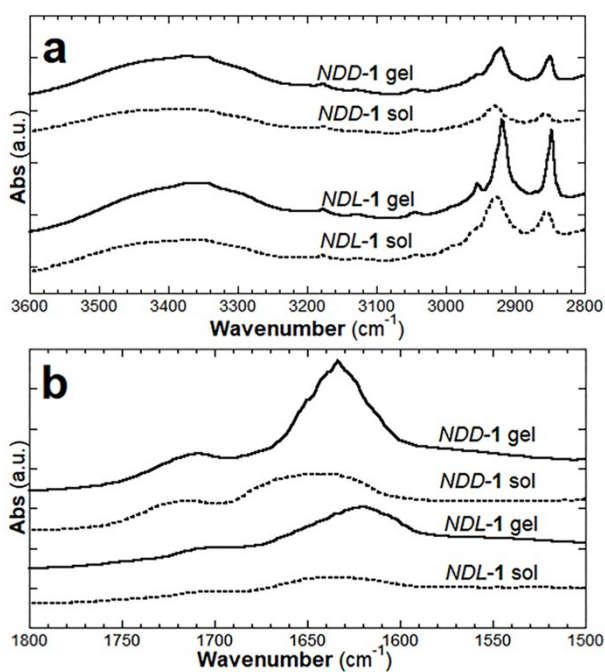

**Fig. S7** FT-IR spectra of the sols and gels of *NDD-1* and *NDL-1* in a mixture of  $\text{CD}_3\text{OD}/\text{D}_2\text{O}$  (6/4, v/v) at a concentration of  $10 \text{ g L}^{-1}$ .

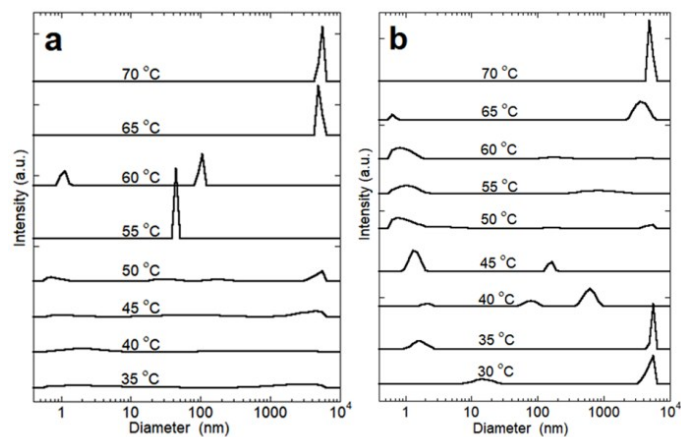

**Fig. S8** Particle size distribution graphs of (a) *NLL-1* and (b) *NLD-1* in a mixture of methanol/water (6/4, v/v) at a concentration of  $10 \text{ g L}^{-1}$  and different temperatures.

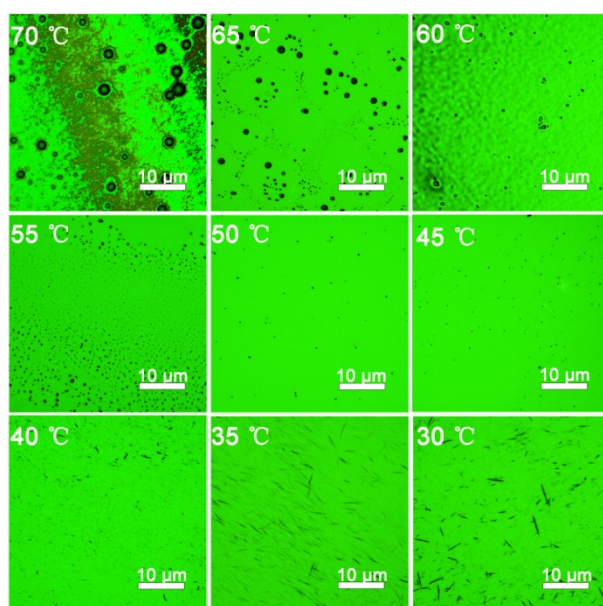

**Fig. S9** Microscopy images of *NLL-1* in a mixture of methanol/water (6/4, v/v) at a concentration of  $10 \text{ g L}^{-1}$  and different temperatures.

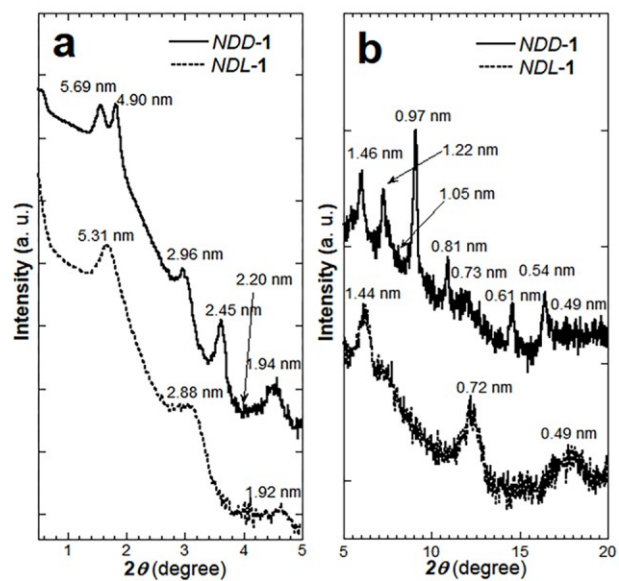

**Fig. S10** (a) SAXRD and (b) WAXRD patterns of the xerogels of *NDD-1* and *NDL-1*.
